# Supplementary material for: Designing organic bridging linkers of metal–organic frameworks for enhanced carbon dioxide adsorption
Source: Royal Society of Chemistry journal article supplement (doi:10.1039/d4nj01197j), 2024-01-01
Supplement: d4nj01197j1.pdf [file d4nj01197j1.pdf]

# Supplementary Information

## Designing of Organic Bridging Linkers of Metal-Organic Frameworks for Enhanced Carbon Dioxide Adsorption

Kahkasha Parveen<sup>1</sup> and Srimanta Pakhira<sup>1,2\*</sup>

<sup>1</sup> Theoretical Condensed Matter Physics & Advanced Computational Materials Science Laboratory, Department of Physics, Indian Institute of Technology Indore (IIT Indore), Simrol, Khandwa Road, Indore, Madhya Pradesh, 453552, India.

<sup>2</sup> Theoretical Condensed Matter Physics & Advanced Computational Materials Science Laboratory, Centre for Advanced Electronics (CAE), Indian Institute of Technology Indore, Simrol, Khandwa Road, Indore, Madhya Pradesh, 453552, India.

\*Corresponding author: [spakhira@iiti.ac.in](mailto:spakhira@iiti.ac.in) (or) [spakhirafsu@gmail.com](mailto:spakhirafsu@gmail.com)

### Table of Contents

|                                                                                           |   |
|-------------------------------------------------------------------------------------------|---|
| 1. Binding Enthalpy of CO <sub>2</sub> Molecule in the Pure and Li-Decorated Linkers..... | 2 |
| 2. The Energies of HOMO and LUMO and Energy Gap (E <sub>g</sub> ).....                    | 3 |
| 3. Coordinates of Optimized Geometries.....                                               | 4 |

### List of Tables

|                                                                                                                                        |   |
|----------------------------------------------------------------------------------------------------------------------------------------|---|
| Table S1: The binding enthalpy of CO <sub>2</sub> with the pure linkers computed by DFT B3LYP-D3 and MP2 methods.....                  | 2 |
| Table S2: The binding enthalpy of CO <sub>2</sub> with the Li-decorated linkers computed by DFT B3LYP-D3 and MP2 methods.....          | 2 |
| Table S3: The HOMO and LUMO energy along with their energy gap for CO <sub>2</sub> adsorption at the side position of the linkers..... | 3 |

## 1. Binding Enthalpy of CO<sub>2</sub> Molecule in the Pure and Li-Decorated Linkers.

Table S1: After CO<sub>2</sub> adsorption, the value of  $\Delta H$  for the pure linkers at the center and side positions, calculated by both B3LYP and MP2 methods. The unit of  $\Delta H$  is expressed in kJ/mol.

| Linkers         | Positions | $\Delta H$ (B3LYP-D3) | $\Delta H$ (MP2) |
|-----------------|-----------|-----------------------|------------------|
| <b>BDC</b>      | Center    | -9.61                 | -8.16            |
|                 | Side      | -8.07                 | -10.01           |
| <b>FBDC</b>     | Center    | -13.34                | -11.93           |
|                 | Side      | -13.33                | -11.93           |
| <b>DFBDC-1</b>  | Center    | -13.16                | -11.77           |
|                 | Side      | -13.15                | -11.77           |
| <b>DFBDC-2</b>  | Center    | -13.29                | -11.97           |
|                 | Side      | -13.29                | -11.96           |
| <b>TFBDC</b>    | Center    | -12.05                | -11.00           |
|                 | Side      | -12.07                | -11.04           |
| <b>DCIBDC-1</b> | Center    | -8.96                 | -8.34            |
|                 | Side      | -8.92                 | -8.26            |
| <b>DCIBDC-2</b> | Center    | -9.95                 | -11.99           |
|                 | Side      | -12.38                | -10.91           |
| <b>NDC</b>      | Center    | -14.09                | -13.98           |
|                 | Side      | -9.39                 | -6.76            |

Table S2: After CO<sub>2</sub> adsorption, the value of  $\Delta H$  for the Li-decorated linkers at the center and side positions calculated by both B3LYP and MP2 methods. The unit of  $\Delta H$  is expressed in kJ/mol.

| Linkers        | Positions | $\Delta H$ (B3LYP) | $\Delta H$ (MP2) |
|----------------|-----------|--------------------|------------------|
| <b>BDC</b>     | Center    | -34.64             | -33.33           |
|                | Side      | -34.64             | -33.34           |
| <b>FBDC</b>    | Center    | -35.21             | -34.07           |
|                | Side      | -35.22             | -34.07           |
| <b>DFBDC-1</b> | Center    | -16.77             | -15.22           |
|                | Side      | -35.30             | -34.06           |
| <b>DFBDC-2</b> | Center    | -11.25             | -10.17           |
|                | Side      | -35.32             | -34.13           |

|                 |        |        |        |
|-----------------|--------|--------|--------|
| <b>TFBDC</b>    | Center | -17.45 | -15.72 |
|                 | Side   | -17.45 | -15.73 |
| <b>DCIBDC-1</b> | Center | -35.00 | -33.69 |
|                 | Side   | -16.85 | -15.81 |
| <b>DCIBDC-2</b> | Center | -17.52 | -16.45 |
|                 | Side   | -15.02 | -14.86 |
| <b>NDC</b>      | Center | -16.53 | -16.27 |
|                 | Side   | -16.55 | -16.28 |

## 2. The Energies of HOMO and LUMO and Energy Gap ( $E_g$ )

**Table S3:** The HOMO and LUMO energies of the pure and Li-decorated linkers along with their energy gaps for CO<sub>2</sub> adsorbing at the side position of the linkers. The units are expressed in eV.

| Linkers         | $E_{\text{HOMO}}$ (eV) |              | $E_{\text{LUMO}}$ (eV) |              | $E_g$ (eV) |              |
|-----------------|------------------------|--------------|------------------------|--------------|------------|--------------|
|                 | Pure                   | Li-decorated | Pure                   | Li-decorated | Pure       | Li-decorated |
| <b>BDC</b>      | -7.75                  | -6.69        | -2.46                  | -1.37        | 5.29       | 5.33         |
| <b>FBDC</b>     | -7.64                  | -6.60        | -2.65                  | -1.50        | 4.99       | 5.09         |
| <b>DFBDC-1</b>  | -7.53                  | -6.50        | -2.83                  | -1.67        | 4.70       | 4.83         |
| <b>DFBDC-2</b>  | -7.62                  | -6.58        | -2.76                  | -1.61        | 4.87       | 4.97         |
| <b>TFBDC</b>    | -7.56                  | -6.69        | -2.62                  | -1.40        | 4.94       | 5.29         |
| <b>DCIBDC-1</b> | -7.26                  | -6.51        | -2.67                  | -1.67        | 4.60       | 4.83         |
| <b>DCIBDC-2</b> | -7.41                  | -6.59        | -2.46                  | -1.48        | 4.95       | 5.12         |
| <b>NDC</b>      | -6.58                  | -5.79        | -2.61                  | -1.70        | 3.97       | 4.09         |

## 3. Coordinates of Optimized Geometries

### 3.1 Geometries of pure linkers

#### BDC

|   |            |             |             |
|---|------------|-------------|-------------|
| C | 0.00365900 | -0.02868600 | -0.02024900 |
| C | 0.01286300 | -0.01784300 | 1.37624400  |
| C | 1.21779300 | 0.00616900  | 2.05789100  |
| C | 2.42212100 | 0.01946800  | 1.35335000  |

|   |             |             |             |
|---|-------------|-------------|-------------|
| C | 2.41291300  | 0.00861900  | -0.04314500 |
| C | 1.20798800  | -0.01532000 | -0.72479100 |
| H | -0.92016500 | -0.02820100 | 1.91864300  |
| H | 1.24678800  | 0.01494100  | 3.13775700  |
| H | 3.34595400  | 0.01897800  | -0.58552400 |
| H | 1.17898400  | -0.02401800 | -1.80465700 |
| C | 3.68699100  | 0.04513200  | 2.13726200  |
| O | 3.74780600  | 0.05471300  | 3.34211300  |
| O | 4.79270100  | 0.05706500  | 1.35498400  |
| H | 5.55446700  | 0.07341000  | 1.95164400  |
| C | -1.26122100 | -0.05425500 | -0.80413500 |
| O | -1.32199800 | -0.06458300 | -2.00898900 |
| O | -2.36689300 | -0.06518300 | -0.02188600 |
| H | -3.12868700 | -0.08145900 | -0.61851200 |

**FBDC**

|   |             |             |             |
|---|-------------|-------------|-------------|
| C | 0.00264100  | -0.02864000 | -0.02000600 |
| C | -0.00498300 | -0.01840000 | 1.37125700  |
| C | 1.19678700  | 0.00537400  | 2.05617100  |
| C | 2.42729400  | 0.01957300  | 1.39096900  |
| C | 2.40538400  | 0.00891700  | -0.01001600 |
| C | 1.21465400  | -0.01485100 | -0.71078100 |
| H | -0.92686000 | -0.02853400 | 1.93116200  |
| H | 3.34421600  | 0.01962000  | -0.54093600 |
| H | 1.20243900  | -0.02303300 | -1.79031800 |

|   |             |             |             |
|---|-------------|-------------|-------------|
| C | 3.71126400  | 0.04469400  | 2.14389800  |
| O | 3.82947000  | 0.05277600  | 3.34128900  |
| O | 4.78490800  | 0.05806300  | 1.31109700  |
| H | 5.56821000  | 0.07363100  | 1.87900900  |
| C | -1.25925600 | -0.05408100 | -0.81173600 |
| O | -1.30825100 | -0.06411800 | -2.01620700 |
| O | -2.36664200 | -0.06510700 | -0.03464000 |
| H | -3.12838300 | -0.08132200 | -0.63149300 |
| F | 1.13919000  | 0.01453000  | 3.38959900  |

**DFBDC-1**

|   |             |             |             |
|---|-------------|-------------|-------------|
| C | -0.00235900 | -0.02874700 | -0.05705900 |
| C | 0.00312300  | -0.01906300 | 1.33885500  |
| C | 1.19090400  | 0.00460200  | 2.04215200  |
| C | 2.42815100  | 0.01973400  | 1.39017700  |
| C | 2.42267400  | 0.01006700  | -0.00575200 |
| C | 1.23490700  | -0.01361300 | -0.70904000 |
| H | -0.92462500 | -0.02996600 | 1.88801900  |
| H | 3.35043500  | 0.02098500  | -0.55489600 |
| C | 3.70919500  | 0.04513200  | 2.15152700  |
| O | 3.81462100  | 0.05424500  | 3.34925000  |
| O | 4.78486100  | 0.05732500  | 1.32437600  |
| H | 5.56823200  | 0.07336800  | 1.89236100  |
| C | -1.28338700 | -0.05422000 | -0.81843400 |
| O | -1.38882700 | -0.06379000 | -2.01614600 |

|   |             |             |             |
|---|-------------|-------------|-------------|
| O | -2.35910900 | -0.06592700 | 0.00872300  |
| H | -3.14245100 | -0.08211000 | -0.55929700 |
| F | 1.11662000  | 0.01264900  | 3.37511600  |
| F | 1.30916200  | -0.02162400 | -2.04200900 |

**DFBDC-2**

|   |             |             |             |
|---|-------------|-------------|-------------|
| C | -0.02842400 | -0.02905600 | 0.00784600  |
| C | 0.00508600  | -0.01738900 | 1.39972600  |
| C | 1.21941500  | 0.00668100  | 2.08666000  |
| C | 2.43180300  | 0.01975800  | 1.39975000  |
| C | 2.39239300  | 0.00803100  | -0.00099300 |
| C | 1.19195100  | -0.01587800 | -0.67740100 |
| H | 3.32181400  | 0.01808300  | -0.54726800 |
| C | 3.72421800  | 0.04475800  | 2.14162400  |
| O | 3.85086700  | 0.05180600  | 3.33764500  |
| O | 4.78663100  | 0.05892100  | 1.29735700  |
| H | 5.57796800  | 0.07410200  | 1.85436600  |
| C | -1.27161700 | -0.05441800 | -0.82032600 |
| O | -1.25792800 | -0.06495900 | -2.02659800 |
| O | -2.41091100 | -0.06410600 | -0.10458600 |
| H | -3.13879800 | -0.08002600 | -0.74369100 |
| F | 1.15873000  | 0.01662700  | 3.41371000  |
| H | 1.16258400  | -0.02506900 | -1.75643200 |
| F | -1.10055200 | -0.02847000 | 2.14163500  |

**TFBDC**

|   |             |             |             |
|---|-------------|-------------|-------------|
| C | -0.02284600 | -0.10917400 | -0.01248900 |
| C | 0.03237800  | -0.09100900 | 1.37839800  |
| C | 1.24764200  | -0.08306400 | 2.04690500  |
| C | 2.45114300  | -0.05977400 | 1.34700200  |
| C | 2.39566800  | -0.06436000 | -0.04404900 |
| C | 1.18095700  | -0.10490500 | -0.71232100 |
| C | 3.74854500  | -0.08335300 | 2.09531500  |
| O | 3.97197600  | -0.80787100 | 3.02533700  |
| O | 4.62466000  | 0.81088900  | 1.60226800  |
| H | 5.44381300  | 0.72282300  | 2.11294700  |
| C | -1.31865700 | -0.18497000 | -0.76019900 |
| O | -1.51888500 | -0.93056100 | -1.67877900 |
| O | -2.22262800 | 0.68888100  | -0.28110600 |
| H | -3.03840000 | 0.56721800  | -0.79031900 |
| F | 1.23970400  | -0.06529700 | 3.37793700  |
| F | 1.18849700  | -0.10691700 | -2.04344800 |
| F | 3.51574000  | -0.06419500 | -0.76747700 |
| F | -1.08735000 | -0.11522500 | 2.10193000  |

**DCIBDC-1**

|   |            |             |             |
|---|------------|-------------|-------------|
| C | 0.00999500 | -0.06098800 | -0.06838400 |
| C | 0.00648800 | -0.03638200 | 1.32634700  |
| C | 1.18128000 | -0.02855700 | 2.06184700  |
| C | 2.41692800 | -0.01594900 | 1.40193600  |
| C | 2.41983300 | -0.00267300 | 0.00695800  |

|    |             |             |             |
|----|-------------|-------------|-------------|
| C  | 1.24557700  | -0.03895500 | -0.72835900 |
| H  | -0.93674500 | -0.02951200 | 1.84813200  |
| H  | 3.36246600  | 0.03044300  | -0.51490000 |
| C  | 3.72667000  | -0.05815800 | 2.12179800  |
| O  | 3.91399800  | -0.52992600 | 3.21089900  |
| O  | 4.72219000  | 0.48478000  | 1.37875000  |
| H  | 5.53749200  | 0.38163000  | 1.89057100  |
| C  | -1.29760500 | -0.15212400 | -0.78780200 |
| O  | -1.46910700 | -0.63939000 | -1.87270200 |
| O  | -2.31052000 | 0.36457000  | -0.04972400 |
| H  | -3.12193400 | 0.23035700  | -0.56053700 |
| Cl | 1.39667500  | 0.00017900  | -2.46201000 |
| Cl | 1.02854200  | 0.01987400  | 3.79510500  |

**DCIBDC-2**

|   |             |             |             |
|---|-------------|-------------|-------------|
| C | -0.04361000 | -0.13359800 | 0.06983000  |
| C | -0.01992700 | -0.10573700 | 1.46872900  |
| C | 1.20724100  | -0.05219600 | 2.14988800  |
| C | 2.40685300  | -0.01646300 | 1.42567200  |
| C | 2.36321400  | -0.04354100 | 0.03208800  |
| C | 1.15792500  | -0.12396900 | -0.63392100 |
| H | 3.28896300  | -0.01261000 | -0.52105600 |
| C | 3.74967000  | -0.02466900 | 2.08812800  |
| O | 4.03824400  | -0.60993100 | 3.09637800  |
| O | 4.65194200  | 0.69115800  | 1.37221300  |



|    |             |             |             |
|----|-------------|-------------|-------------|
| H  | 5.50218600  | 0.59798500  | 1.82649500  |
| C  | -1.28041600 | -0.19254300 | -0.77573300 |
| O  | -1.36652400 | -0.88360500 | -1.75862600 |
| O  | -2.24834200 | 0.65194600  | -0.37934100 |
| H  | -2.98933700 | 0.54311700  | -0.99421700 |
| Cl | 1.21406500  | 0.02017100  | 3.88277500  |
| H  | 1.12397500  | -0.17642200 | -1.71194300 |
| Cl | -1.49600100 | -0.20897200 | 2.38054600  |

**NDC**

|   |             |             |             |
|---|-------------|-------------|-------------|
| C | 0.10172200  | -0.04542000 | 0.09688800  |
| C | 0.06409300  | -0.09400100 | 1.47334000  |
| C | 1.28278000  | -0.04301600 | 2.22409900  |
| C | 2.53240700  | 0.04742400  | 1.51597200  |
| C | 2.51401300  | 0.10966700  | 0.08513600  |
| C | 1.31322800  | 0.07210500  | -0.58950000 |
| H | 0.38224500  | -0.16856600 | 4.17841400  |
| H | -0.81863300 | -0.08775300 | -0.46376800 |
| C | 1.31189300  | -0.10486100 | 3.64081900  |
| C | 3.73345300  | 0.09815500  | 2.26876600  |
| H | 1.30476000  | 0.12310500  | -1.66676800 |
| C | 3.71459400  | 0.04589800  | 3.63704300  |
| C | 2.49596300  | -0.06313300 | 4.32748100  |
| H | 4.67234200  | 0.16179300  | 1.74748400  |
| H | 4.64544400  | 0.08534900  | 4.18683800  |

|   |             |             |             |
|---|-------------|-------------|-------------|
| H | 2.48966000  | -0.11092000 | 5.40821700  |
| C | 3.76616600  | 0.17335700  | -0.72666300 |
| O | 4.86917100  | -0.17759900 | -0.38296600 |
| O | 3.54506400  | 0.66978000  | -1.97128100 |
| H | 4.39607600  | 0.63333200  | -2.43082000 |
| C | -1.27551200 | -0.15715300 | 2.13091400  |
| O | -1.54473200 | 0.18476700  | 3.25719400  |
| O | -2.23279200 | -0.64133300 | 1.29805700  |
| H | -3.06373800 | -0.60521600 | 1.79300100  |

### 3.2 Geometries of Li-decorated linkers

#### BDC

|   |             |             |             |
|---|-------------|-------------|-------------|
| C | -0.00211300 | -0.00146700 | 0.00957700  |
| C | 0.01218300  | -0.00189500 | 1.40500700  |
| C | 1.21784300  | -0.00267500 | 2.08812200  |
| C | 2.42229400  | -0.00304000 | 1.38325000  |
| C | 2.40798700  | -0.00260200 | -0.01217500 |
| C | 1.20233000  | -0.00182200 | -0.69529800 |
| H | -0.92989500 | -0.00159700 | 1.93359500  |
| H | 1.24863800  | -0.00300800 | 3.16792200  |
| H | 3.35007100  | -0.00287800 | -0.54075700 |
| H | 1.17154400  | -0.00146900 | -1.77509500 |
| C | 3.72345100  | -0.00390100 | 2.12064100  |
| O | 3.72197600  | -0.00437100 | 3.39322500  |
| O | 4.81436700  | -0.00429400 | 1.46517800  |

|    |             |             |             |
|----|-------------|-------------|-------------|
| C  | -1.30329300 | -0.00062500 | -0.72774800 |
| O  | -1.30178400 | -0.00036300 | -2.00049800 |
| O  | -2.39423500 | -0.00041300 | -0.07245900 |
| Li | 5.54756100  | -0.00634600 | 3.15341400  |
| Li | -3.12599800 | -0.00039300 | -1.76205300 |

**FBDC**

|    |             |             |             |
|----|-------------|-------------|-------------|
| C  | -0.00565500 | -0.00203500 | 0.00213900  |
| C  | -0.00058200 | -0.00202200 | 1.39269500  |
| C  | 1.20472500  | -0.00203900 | 2.07194100  |
| C  | 2.43164600  | -0.00206500 | 1.40208600  |
| C  | 2.39722300  | -0.00200700 | 0.00257900  |
| C  | 1.20290100  | -0.00203000 | -0.69476300 |
| H  | -0.92927000 | -0.00198200 | 1.94280700  |
| H  | 3.34408400  | -0.00196600 | -0.51648100 |
| H  | 1.18408500  | -0.00203200 | -1.77416600 |
| C  | 3.76161300  | -0.00221900 | 2.09331400  |
| O  | 3.83388400  | -0.00321400 | 3.35830500  |
| O  | 4.81344500  | -0.00073400 | 1.37373700  |
| C  | -1.30839500 | -0.00201400 | -0.73564100 |
| O  | -1.30361500 | -0.00209800 | -2.00688300 |
| O  | -2.39702100 | -0.00203700 | -0.07893700 |
| F  | 1.14738100  | -0.00194300 | 3.41149600  |
| Li | 5.64363300  | -0.00174300 | 3.01987900  |
| Li | -3.13312200 | -0.00187300 | -1.76938400 |

**DFBDC-1**

|    |             |             |             |
|----|-------------|-------------|-------------|
| C  | -0.01374900 | 0.00370800  | 0.00461000  |
| C  | -0.00052100 | 0.00211600  | 1.39946500  |
| C  | 1.18784600  | -0.00115700 | 2.10239500  |
| C  | 2.42392300  | -0.00299300 | 1.45044300  |
| C  | 2.41070800  | -0.00137800 | 0.05559500  |
| C  | 1.22235000  | 0.00188900  | -0.64734100 |
| H  | -0.93877900 | 0.00345900  | 1.93256300  |
| H  | 3.34897700  | -0.00270600 | -0.47748800 |
| C  | 3.74917900  | -0.00653700 | 2.15446000  |
| O  | 3.80592600  | -0.00830400 | 3.41888500  |
| O  | 4.80514600  | -0.00798600 | 1.44352600  |
| C  | -1.33883800 | 0.00719700  | -0.69942300 |
| O  | -1.39573800 | 0.00890200  | -1.96387300 |
| O  | -2.39496700 | 0.00904200  | 0.01142500  |
| F  | 1.10857800  | -0.00249900 | 3.44102900  |
| F  | 1.30157500  | 0.00325600  | -1.98597600 |
| Li | 5.62393600  | -0.01254500 | 3.09910400  |
| Li | -3.21251500 | 0.01307800  | -1.64359800 |

**DFBDC-2**

|   |             |             |            |
|---|-------------|-------------|------------|
| C | -0.00406000 | 0.01915900  | 0.01057300 |
| C | 0.01367400  | 0.01009900  | 1.40256000 |
| C | 1.21828500  | -0.00576600 | 2.10771100 |
| C | 2.44082900  | -0.01308900 | 1.44161500 |

|    |             |             |             |
|----|-------------|-------------|-------------|
| C  | 2.41781400  | -0.00394800 | 0.04213800  |
| C  | 1.22755100  | 0.01177300  | -0.65451800 |
| H  | 3.36582500  | -0.00960500 | -0.47350900 |
| C  | 3.76399100  | -0.03005300 | 2.14999400  |
| O  | 3.81891400  | -0.03902600 | 3.41478600  |
| O  | 4.82157800  | -0.03563000 | 1.44164800  |
| C  | -1.26956800 | 0.03619600  | -0.79639000 |
| O  | -1.16987200 | 0.04462000  | -2.06518100 |
| O  | -2.39920100 | 0.04189300  | -0.22467000 |
| F  | 1.13127800  | -0.01337000 | 3.43898400  |
| H  | 1.21306600  | 0.01882300  | -1.73359200 |
| F  | -1.10456400 | 0.01613000  | 2.13029400  |
| Li | 5.63522100  | -0.05452500 | 3.09936800  |
| Li | -3.01445900 | 0.06253100  | -1.96344200 |

### **TFBDC**

|   |             |             |             |
|---|-------------|-------------|-------------|
| C | -0.00594900 | 0.02324100  | 0.00434300  |
| C | 0.00288200  | 0.02066100  | 1.39362700  |
| C | 1.19411800  | 0.00934900  | 2.10327600  |
| C | 2.42000800  | 0.03776600  | 1.45017200  |
| C | 2.41097000  | 0.05877700  | 0.06104300  |
| C | 1.22014000  | 0.03320300  | -0.64892000 |
| C | 3.71379400  | 0.04552300  | 2.22125800  |
| O | 3.90855000  | -0.85653900 | 3.08385200  |
| O | 4.55716200  | 0.95378700  | 1.97742600  |

|    |             |             |             |
|----|-------------|-------------|-------------|
| C  | -1.29973300 | 0.01553800  | -0.76674500 |
| O  | -1.47471200 | -0.87582600 | -1.64455800 |
| O  | -2.16289600 | 0.90070000  | -0.50767500 |
| F  | 1.14322400  | 0.00483000  | 3.44070800  |
| F  | 1.27085400  | 0.05268800  | -1.98622700 |
| F  | 3.56299700  | 0.06974300  | -0.62009700 |
| F  | -1.14898700 | -0.00554100 | 2.07462400  |
| Li | 5.51474200  | 0.05631000  | 3.29478800  |
| Li | -3.10070000 | 0.00495500  | -1.84013900 |

#### DCIBDC-1

|   |             |             |             |
|---|-------------|-------------|-------------|
| C | -0.01200100 | 0.01396000  | 0.00533500  |
| C | 0.00158700  | 0.02058800  | 1.39947300  |
| C | 1.18449900  | 0.01428200  | 2.12100300  |
| C | 2.41464200  | 0.03642800  | 1.45517900  |
| C | 2.40005100  | 0.08368000  | 0.06181200  |
| C | 1.21776700  | 0.05593700  | -0.66020200 |
| H | -0.94499700 | 0.03388200  | 1.91668900  |
| H | 3.34527400  | 0.14635900  | -0.45425700 |
| C | 3.76467100  | 0.00137900  | 2.11840000  |
| O | 3.91158000  | -0.56395500 | 3.23996200  |
| O | 4.74667900  | 0.52277700  | 1.50150100  |
| C | -1.36020300 | -0.05026600 | -0.65937500 |
| O | -1.48736000 | -0.58862100 | -1.79656100 |
| O | -2.35988600 | 0.41810200  | -0.02853700 |

|    |             |             |             |
|----|-------------|-------------|-------------|
| Cl | 1.35417200  | 0.14706700  | -2.40131400 |
| Cl | 1.04565000  | 0.04896000  | 3.86395600  |
| Li | -3.26082700 | -0.13540800 | -1.54539200 |
| Li | 5.66791500  | -0.04059700 | 3.00238500  |

### DCIBDC-2

|    |             |             |             |
|----|-------------|-------------|-------------|
| C  | -0.01975400 | -0.00639200 | 0.01390900  |
| C  | 0.00341800  | 0.01133400  | 1.41251400  |
| C  | 1.22862500  | 0.01232400  | 2.09866000  |
| C  | 2.43325000  | 0.01404600  | 1.38718600  |
| C  | 2.39250200  | 0.01441000  | -0.00568000 |
| C  | 1.18888600  | -0.02276600 | -0.67933800 |
| H  | 3.32886500  | 0.03921300  | -0.54275000 |
| C  | 3.79812900  | -0.02098800 | 2.02219300  |
| O  | 4.01406000  | -0.73317600 | 3.04414900  |
| O  | 4.72554000  | 0.64654500  | 1.46503400  |
| C  | -1.27439400 | 0.02734300  | -0.81785700 |
| O  | -1.29022900 | -0.65555100 | -1.88998800 |
| O  | -2.25221700 | 0.75310800  | -0.47788000 |
| Cl | 1.23117000  | 0.07940400  | 3.83944400  |
| H  | 1.15725700  | -0.06005800 | -1.75798600 |
| Cl | -1.48281700 | -0.03576500 | 2.32034500  |
| Li | 5.71831700  | -0.04493000 | 2.86665000  |
| Li | -2.99664300 | 0.04876900  | -2.01401200 |

### NDC

|    |             |             |             |
|----|-------------|-------------|-------------|
| C  | -0.00117900 | -0.00539500 | -0.00414100 |
| C  | -0.01079700 | -0.00826700 | 1.37308800  |
| C  | 1.23089100  | -0.00395100 | 2.08651000  |
| C  | 2.46557200  | -0.00617300 | 1.34379700  |
| C  | 2.41712200  | 0.01396700  | -0.08739500 |
| C  | 1.19580800  | 0.02524400  | -0.72398600 |
| H  | 0.37599200  | -0.02046000 | 4.05950000  |
| H  | -0.94573000 | -0.02258300 | -0.52636900 |
| C  | 1.29766800  | -0.02571400 | 3.50444000  |
| C  | 3.68685600  | -0.00073300 | 2.06761300  |
| H  | 1.17712500  | 0.05380000  | -1.80287400 |
| C  | 3.70365700  | -0.01139700 | 3.43683100  |
| C  | 2.49928100  | -0.03059900 | 4.16111300  |
| H  | 4.60904900  | -0.00582400 | 1.51346000  |
| H  | 4.65032000  | -0.00856400 | 3.96163000  |
| H  | 2.51912300  | -0.04576600 | 5.24322300  |
| C  | 3.62493600  | 0.00352700  | -0.98553400 |
| O  | 4.75865400  | -0.40461400 | -0.57435900 |
| O  | 3.48306900  | 0.38815900  | -2.19149100 |
| C  | -1.36980200 | 0.00503600  | 2.01976100  |
| O  | -1.53524600 | 0.40825500  | 3.21600000  |
| O  | -2.37067900 | -0.37158900 | 1.32781100  |
| Li | 5.26498400  | -0.03493900 | -2.30550100 |
| Li | -3.30370900 | 0.04987000  | 2.85042400  |



### 3.3 Geometries of adsorbed CO<sub>2</sub> molecule placed at the Center and Side positions of pure linkers.

#### BDC – Center

|   |             |             |             |
|---|-------------|-------------|-------------|
| C | -0.17688600 | -0.22326000 | -0.17003400 |
| C | -0.18134000 | 0.38986800  | 1.08452300  |
| C | 1.01693200  | 0.67772300  | 1.71609800  |
| C | 2.22807500  | 0.35657600  | 1.10104800  |
| C | 2.23241200  | -0.25996300 | -0.15200800 |
| C | 1.03409900  | -0.54621800 | -0.78348100 |
| H | -1.11901000 | 0.63744300  | 1.55805000  |
| H | 1.03066200  | 1.15207500  | 2.68639300  |
| H | 3.17069200  | -0.50663700 | -0.62486500 |
| H | 1.01535900  | -1.01977500 | -1.75423600 |
| C | 3.48579200  | 0.70138900  | 1.81579400  |
| O | 3.53635300  | 1.32342500  | 2.85049100  |
| O | 4.59394400  | 0.25009400  | 1.18858600  |
| H | 5.35176600  | 0.53917100  | 1.71683200  |
| C | -1.43451500 | -0.55385100 | -0.89500800 |
| O | -1.48274900 | -1.08343500 | -1.97774000 |
| O | -2.54695900 | -0.19662400 | -0.21071500 |
| H | -3.30375200 | -0.44987700 | -0.75820800 |
| C | 2.19457600  | 3.87879700  | 2.29741700  |
| O | 1.43836300  | 3.79445700  | 3.17327900  |
| O | 2.93566100  | 3.98100000  | 1.41036900  |

#### BDC – Side

|                      |             |             |             |
|----------------------|-------------|-------------|-------------|
| C                    | 0.16540500  | 0.25267600  | 0.14138200  |
| C                    | 0.16421300  | 0.10368300  | 1.52893600  |
| C                    | 1.35080000  | -0.14927700 | 2.19678600  |
| C                    | 2.54662600  | -0.25657600 | 1.48637500  |
| C                    | 2.54677900  | -0.11274100 | 0.09668500  |
| C                    | 1.36049400  | 0.14191300  | -0.57014100 |
| H                    | -0.76112500 | 0.19325400  | 2.07684600  |
| H                    | 1.37273600  | -0.26147300 | 3.27103100  |
| H                    | 3.47409400  | -0.19397900 | -0.44939700 |
| H                    | 1.33961700  | 0.26272800  | -1.64343300 |
| C                    | 3.79646100  | -0.50283100 | 2.25762700  |
| O                    | 3.85055600  | -0.59937700 | 3.45872700  |
| O                    | 4.88949900  | -0.60717900 | 1.46799500  |
| H                    | 5.64622000  | -0.74389800 | 2.05549700  |
| C                    | -1.07690900 | 0.54068800  | -0.62604900 |
| O                    | -1.12528600 | 0.68467700  | -1.82276600 |
| O                    | -2.17479400 | 0.62817600  | 0.16130100  |
| H                    | -2.92184300 | 0.81915900  | -0.42349400 |
| C                    | 2.75742800  | 3.02874500  | 1.43117300  |
| O                    | 1.64708000  | 3.27668400  | 1.20525500  |
| O                    | 3.86965200  | 2.78570100  | 1.65796800  |
| <b>FBDC – Center</b> |             |             |             |
| C                    | -0.13882800 | -0.42391000 | -0.21346100 |
| C                    | -0.15235500 | 0.16784300  | 1.04608300  |

|   |             |             |             |
|---|-------------|-------------|-------------|
| C | 1.04698200  | 0.47290600  | 1.66042700  |
| C | 2.27887200  | 0.20441000  | 1.05907900  |
| C | 2.26448300  | -0.40065000 | -0.20378100 |
| C | 1.07572000  | -0.70819300 | -0.83796500 |
| H | -1.07619400 | 0.39385800  | 1.55468300  |
| H | 3.20602000  | -0.61855100 | -0.68318300 |
| H | 1.06699800  | -1.16766900 | -1.81490000 |
| C | 3.55830300  | 0.57262200  | 1.72083100  |
| O | 3.67912800  | 1.31591400  | 2.66181100  |
| O | 4.62329200  | -0.02348700 | 1.13170200  |
| H | 5.40883000  | 0.28852400  | 1.60342400  |
| C | -1.39789000 | -0.77152600 | -0.93057500 |
| O | -1.44191400 | -1.28414800 | -2.02062200 |
| O | -2.50792600 | -0.45060500 | -0.22726700 |
| H | -3.26801300 | -0.70946100 | -0.76768700 |
| F | 0.98894200  | 1.02833500  | 2.87720800  |
| C | 2.07851100  | 3.71852700  | 2.70052500  |
| O | 1.91241200  | 3.55754100  | 1.56155900  |
| O | 2.22937600  | 3.91267400  | 3.83256300  |

**FBDC – Side**

|   |            |             |             |
|---|------------|-------------|-------------|
| C | 0.07486400 | -0.01977100 | -0.06532200 |
| C | 0.17320800 | 0.45478100  | 1.23927700  |
| C | 1.40368600 | 0.44929500  | 1.86756000  |
| C | 2.55782800 | -0.02046900 | 1.23625100  |

|   |             |             |             |
|---|-------------|-------------|-------------|
| C | 2.42945800  | -0.50168200 | -0.07257800 |
| C | 1.20893800  | -0.49935900 | -0.72088100 |
| H | -0.68770900 | 0.82647500  | 1.77210200  |
| H | 3.30910800  | -0.87142900 | -0.57586400 |
| H | 1.11373500  | -0.86404000 | -1.73258500 |
| C | 3.87939800  | 0.01473700  | 1.91645200  |
| O | 4.14400000  | 0.63501200  | 2.91533800  |
| O | 4.80154400  | -0.74020200 | 1.27123400  |
| H | 5.63031400  | -0.64035400 | 1.76124400  |
| C | -1.22205300 | -0.03501500 | -0.79885300 |
| O | -1.36216300 | -0.43580400 | -1.92697300 |
| O | -2.24667800 | 0.45326700  | -0.06295100 |
| H | -3.03889500 | 0.40500900  | -0.61688800 |
| F | 1.45141600  | 0.90124800  | 3.12686800  |
| C | 3.08407600  | 3.30919800  | 3.16464100  |
| O | 2.89900100  | 3.28067200  | 2.01761000  |
| O | 3.26131600  | 3.37381500  | 4.30760800  |

**DFBDC-1 – Center**

|   |             |             |             |
|---|-------------|-------------|-------------|
| C | -0.13988100 | -0.41372200 | -0.19588000 |
| C | -0.13137200 | 0.16137500  | 1.07641500  |
| C | 1.05838400  | 0.46081200  | 1.70559800  |
| C | 2.29309600  | 0.20275300  | 1.10556700  |
| C | 2.28598500  | -0.38086600 | -0.16157900 |
| C | 1.09562100  | -0.67668000 | -0.79603000 |

|   |             |             |             |
|---|-------------|-------------|-------------|
| H | -1.05758800 | 0.37926800  | 1.58325200  |
| H | 3.21286200  | -0.60256700 | -0.66598300 |
| C | 3.57445800  | 0.55781700  | 1.77485900  |
| O | 3.68943800  | 1.27258500  | 2.73725700  |
| O | 4.63794000  | -0.01508800 | 1.16395500  |
| H | 5.42629100  | 0.28249100  | 1.64047000  |
| C | -1.42307300 | -0.73413600 | -0.88314800 |
| O | -1.53140000 | -1.23206800 | -1.97208200 |
| O | -2.49636200 | -0.39399800 | -0.12580300 |
| H | -3.28170200 | -0.63143300 | -0.63905600 |
| F | 0.99159000  | 0.99964300  | 2.92957400  |
| F | 1.16628900  | -1.22600800 | -2.01026600 |
| C | 2.09341200  | 3.69089600  | 2.77806700  |
| O | 1.94082700  | 3.52985600  | 1.63710500  |
| O | 2.23215900  | 3.88300200  | 3.91185800  |

**DFBDC-1 – Side**

|   |             |             |             |
|---|-------------|-------------|-------------|
| C | 0.06204600  | -0.01105000 | -0.05016700 |
| C | 0.17448900  | 0.45128400  | 1.26254200  |
| C | 1.39323300  | 0.45015700  | 1.90725900  |
| C | 2.55493500  | -0.01068000 | 1.28342200  |
| C | 2.44209700  | -0.48206100 | -0.02476700 |
| C | 1.22357700  | -0.47663800 | -0.67455600 |
| H | -0.69268400 | 0.81624900  | 1.78889200  |
| H | 3.30901200  | -0.85128300 | -0.54898700 |

|   |             |             |             |
|---|-------------|-------------|-------------|
| C | 3.87437900  | 0.02061200  | 1.97188700  |
| O | 4.12362400  | 0.62204400  | 2.98505500  |
| O | 4.80342400  | -0.71236900 | 1.31464000  |
| H | 5.63078700  | -0.62084900 | 1.80881300  |
| C | -1.25180500 | -0.00644500 | -0.75398800 |
| O | -1.44780200 | -0.38514100 | -1.87810400 |
| O | -2.24084300 | 0.48709000  | 0.03306500  |
| H | -3.05234300 | 0.45700900  | -0.49336400 |
| F | 1.42523900  | 0.89676100  | 3.16918100  |
| F | 1.19325500  | -0.93461300 | -1.92773500 |
| C | 3.06094500  | 3.30844000  | 3.21406300  |
| O | 2.89045700  | 3.26682500  | 2.06504000  |
| O | 3.22439100  | 3.38388400  | 4.35829200  |

**DFBDC-2 – Center**

|   |             |             |             |
|---|-------------|-------------|-------------|
| C | -0.11828100 | -0.40842200 | -0.26458900 |
| C | -0.16294400 | 0.27618800  | 0.94732400  |
| C | 1.00740100  | 0.55576900  | 1.64972200  |
| C | 2.25017000  | 0.16310600  | 1.16313700  |
| C | 2.29057700  | -0.53431800 | -0.05043000 |
| C | 1.13316500  | -0.80757600 | -0.74749800 |
| H | 3.24616800  | -0.84833000 | -0.43896200 |
| C | 3.49695700  | 0.51108000  | 1.89841500  |
| O | 3.59434700  | 1.34447000  | 2.76274000  |
| O | 4.55320800  | -0.21923600 | 1.47101100  |

|   |             |             |             |
|---|-------------|-------------|-------------|
| H | 5.32264000  | 0.08508100  | 1.97370500  |
| C | -1.30901900 | -0.75540600 | -1.09790200 |
| O | -1.22937800 | -1.35980000 | -2.13877700 |
| O | -2.47993900 | -0.33415300 | -0.58655300 |
| H | -3.16924300 | -0.61264500 | -1.20764100 |
| F | 0.87830900  | 1.20078800  | 2.80826900  |
| H | 1.16276900  | -1.33816700 | -1.68710300 |
| F | -1.30335300 | 0.69184400  | 1.49404200  |
| C | 2.11443500  | 3.82308300  | 2.42847000  |
| O | 1.99386300  | 3.52925500  | 1.31027700  |
| O | 2.22367300  | 4.14657700  | 3.53520200  |

**DFBDC-2 – Side**

|   |             |             |             |
|---|-------------|-------------|-------------|
| C | 0.06318400  | -0.01328900 | -0.03510800 |
| C | 0.17039600  | 0.41133900  | 1.28682200  |
| C | 1.40139100  | 0.40136600  | 1.93948800  |
| C | 2.55546600  | -0.02935400 | 1.29289300  |
| C | 2.44230400  | -0.46523100 | -0.03302300 |
| C | 1.22527400  | -0.45169200 | -0.68016500 |
| H | 3.32737700  | -0.80505000 | -0.54669200 |
| C | 3.87266600  | 0.00987000  | 1.98548900  |
| O | 4.12173700  | 0.62808900  | 2.98888100  |
| O | 4.80166200  | -0.73454400 | 1.34150700  |
| H | 5.62861100  | -0.63370800 | 1.83476900  |
| C | -1.20346900 | -0.03972600 | -0.82727500 |

|   |             |             |             |
|---|-------------|-------------|-------------|
| O | -1.25646900 | -0.42338100 | -1.96966500 |
| O | -2.28185600 | 0.40256700  | -0.15537100 |
| H | -3.03232000 | 0.34015300  | -0.76476100 |
| F | 1.41684400  | 0.80875600  | 3.20782100  |
| H | 1.13730900  | -0.77986700 | -1.70477100 |
| F | -0.87620200 | 0.84006100  | 1.98900300  |
| C | 2.97176000  | 3.28299400  | 3.26174400  |
| O | 2.75943300  | 3.24149800  | 2.11963400  |
| O | 3.17624200  | 3.35710500  | 4.39934100  |

**TFBDC – Center**

|   |             |             |             |
|---|-------------|-------------|-------------|
| C | -0.20465100 | -0.24899800 | -0.02024700 |
| C | -0.16099000 | -0.70529600 | 1.29422800  |
| C | 0.98456300  | -0.56576800 | 2.06387600  |
| C | 2.11697900  | 0.06402500  | 1.55456800  |
| C | 2.06859800  | 0.52667100  | 0.24351000  |
| C | 0.93454800  | 0.36378700  | -0.53533800 |
| C | 3.34406600  | 0.19026300  | 2.40178200  |
| O | 3.79389500  | -0.69398300 | 3.07487700  |
| O | 3.87872800  | 1.42628600  | 2.32249900  |
| H | 4.68594900  | 1.43236200  | 2.85885600  |
| C | -1.40590500 | -0.44099200 | -0.89447100 |
| O | -1.35257600 | -0.83335300 | -2.02723600 |
| O | -2.54418900 | -0.11262200 | -0.25748300 |
| H | -3.27623400 | -0.28368700 | -0.86936800 |



|   |             |             |             |
|---|-------------|-------------|-------------|
| F | 0.96803100  | -1.01721400 | 3.31588300  |
| F | 0.94452500  | 0.83928800  | -1.77804900 |
| F | 3.12958100  | 1.12775300  | -0.30223200 |
| F | -1.21380800 | -1.31937400 | 1.83440800  |
| C | 2.93999100  | 3.86253200  | 0.99347700  |
| O | 4.03624900  | 4.23960400  | 0.99800800  |
| O | 1.83638500  | 3.50163700  | 0.98853800  |

**TFBDC – Side**

|   |             |             |             |
|---|-------------|-------------|-------------|
| C | 0.01685300  | -0.00450000 | 0.03039400  |
| C | -0.02169400 | -0.07309500 | 1.42028300  |
| C | 1.14535700  | -0.12587100 | 2.16815400  |
| C | 2.39313300  | -0.08007200 | 1.55221100  |
| C | 2.42957500  | -0.00320400 | 0.16368300  |
| C | 1.26497700  | 0.02211100  | -0.58615700 |
| C | 3.63667300  | -0.15135800 | 2.38165800  |
| O | 3.79973400  | -0.91695300 | 3.28972500  |
| O | 4.55079900  | 0.75920200  | 1.98775500  |
| H | 5.34168200  | 0.63719200  | 2.53450800  |
| C | -1.22601100 | -0.00851400 | -0.80588500 |
| O | -1.37102400 | -0.68732500 | -1.78473800 |
| O | -2.15042500 | 0.84489800  | -0.33003300 |
| H | -2.93036900 | 0.77222700  | -0.90096500 |
| F | 1.04822600  | -0.18674600 | 3.49421100  |
| F | 1.36456700  | 0.10952600  | -1.91014300 |

|   |             |             |             |
|---|-------------|-------------|-------------|
| F | 3.59844300  | 0.03119400  | -0.48238200 |
| F | -1.18755800 | -0.12315400 | 2.06493400  |
| C | 4.40886100  | 2.91161200  | 0.00261900  |
| O | 3.24970900  | 2.95709000  | 0.05312700  |
| O | 5.56648100  | 2.88308000  | -0.05302400 |

**DCIBDC-1 – Center**

|    |             |             |             |
|----|-------------|-------------|-------------|
| C  | -0.18035200 | -0.34214800 | -0.16460800 |
| C  | -0.31402700 | -0.47571300 | 1.21780900  |
| C  | 0.75691900  | -0.28892400 | 2.07662100  |
| C  | 2.00670100  | 0.07269500  | 1.56212700  |
| C  | 2.13306400  | 0.24234000  | 0.18470500  |
| C  | 1.06992600  | 0.02741100  | -0.67770000 |
| H  | -1.27603700 | -0.73499600 | 1.62916100  |
| H  | 3.08364600  | 0.54745900  | -0.22230600 |
| C  | 3.21386800  | 0.25986100  | 2.42023900  |
| O  | 3.45685200  | -0.33170700 | 3.43596500  |
| O  | 4.05350000  | 1.19301700  | 1.89717200  |
| H  | 4.82847000  | 1.23482700  | 2.47655400  |
| C  | -1.36214500 | -0.63722000 | -1.03155300 |
| O  | -1.31961000 | -1.01489200 | -2.17155100 |
| O  | -2.52849400 | -0.45554500 | -0.36492100 |
| H  | -3.23767200 | -0.70494700 | -0.97495300 |
| Cl | 1.36181900  | 0.29619500  | -2.37248700 |
| Cl | 0.45313100  | -0.45913500 | 3.78209800  |

|   |            |            |            |
|---|------------|------------|------------|
| C | 2.76603700 | 3.80249900 | 1.89066500 |
| O | 1.73300600 | 3.32030900 | 1.67361800 |
| O | 3.79324900 | 4.29475100 | 2.11124700 |

**DCIBDC-1 – Side**

|    |             |             |             |
|----|-------------|-------------|-------------|
| C  | -0.06130500 | -0.14010900 | -0.01332700 |
| C  | 0.01380900  | 0.13156200  | 1.35314900  |
| C  | 1.21985000  | 0.12041800  | 2.03492600  |
| C  | 2.40794100  | -0.13959700 | 1.34325100  |
| C  | 2.33861500  | -0.37538800 | -0.02852300 |
| C  | 1.12999900  | -0.39311800 | -0.70600800 |
| H  | -0.89169000 | 0.35256300  | 1.89457000  |
| H  | 3.24923100  | -0.55040500 | -0.57851800 |
| C  | 3.74046000  | -0.19970800 | 2.01369100  |
| O  | 3.94961600  | -0.56431400 | 3.13797500  |
| O  | 4.73500900  | 0.19739500  | 1.17548300  |
| H  | 5.56951300  | 0.09640500  | 1.65651500  |
| C  | -1.40726500 | -0.18737900 | -0.66249700 |
| O  | -1.69291400 | -0.82456700 | -1.64046600 |
| O  | -2.31183700 | 0.56784100  | 0.00770900  |
| H  | -3.15920000 | 0.45236300  | -0.44606700 |
| Cl | 1.19129900  | -0.67864500 | -2.42192300 |
| Cl | 1.18141100  | 0.50091900  | 3.73311400  |
| C  | 4.41689000  | 2.98655500  | 0.41936000  |
| O  | 5.57135300  | 3.10228300  | 0.41987300  |

O 3.26103100 2.88310100 0.41907200

**DCIBDC-2 -Center**

C 0.25944500 0.11118500 0.08770500

C 0.36403000 0.28018600 1.47139000

C 1.59114600 0.06708400 2.11679400

C 2.71431000 -0.31214600 1.36852900

C 2.59062200 -0.47944800 -0.01026800

C 1.37648900 -0.29196000 -0.63797900

H 3.45886200 -0.76797500 -0.58189500

C 4.03728800 -0.61765700 1.99967400

O 4.20816800 -1.13479400 3.07014700

O 5.06106500 -0.27532300 1.17923000

H 5.87631500 -0.54704200 1.62581500

C -0.98600400 0.32808500 -0.71550900

O -1.34514200 -0.41567600 -1.59035500

O -1.62265700 1.47857800 -0.41787900

H -2.40771700 1.53153400 -0.98322400

Cl 1.70815000 0.33330100 3.82601000

H 1.27399500 -0.44588200 -1.70187500

Cl -1.03554100 0.70209000 2.41504300

C -0.53496800 3.79996300 0.98927600

O 0.54889000 3.39730700 0.88671200

O -1.61079400 4.22069500 1.09213500

**DCIBDC-2 – Side**

|    |             |             |             |
|----|-------------|-------------|-------------|
| C  | 0.14595300  | 0.03159000  | -0.07426500 |
| C  | 0.09151300  | 0.17173900  | 1.31730500  |
| C  | 1.25725200  | 0.01828200  | 2.08453100  |
| C  | 2.47457700  | -0.26511200 | 1.45206000  |
| C  | 2.51071600  | -0.40434100 | 0.06530300  |
| C  | 1.35858200  | -0.27928300 | -0.68380400 |
| H  | 3.45254700  | -0.61403500 | -0.41744500 |
| C  | 3.74473700  | -0.47785500 | 2.21375300  |
| O  | 3.85970000  | -1.05910700 | 3.25682100  |
| O  | 4.80468100  | 0.04478300  | 1.54274300  |
| H  | 5.59549500  | -0.16575800 | 2.06071200  |
| C  | -1.02161300 | 0.17176200  | -1.00478700 |
| O  | -1.20721500 | -0.56964700 | -1.93550200 |
| O  | -1.79117700 | 1.24365000  | -0.74770400 |
| H  | -2.50241100 | 1.24768100  | -1.40586200 |
| Cl | 1.18451200  | 0.23789900  | 3.80191900  |
| H  | 1.37887000  | -0.41269200 | -1.75508600 |
| Cl | -1.42150000 | 0.46917300  | 2.11796600  |
| C  | 3.80633500  | 2.66330500  | 0.37899500  |
| O  | 3.36829400  | 2.90102000  | 1.42680300  |
| O  | 4.23793300  | 2.43329200  | -0.67312200 |

**NDC – Center**

|   |            |            |             |
|---|------------|------------|-------------|
| C | 0.00104400 | 0.02215300 | -0.00222800 |
| C | 0.00274200 | 0.01511400 | 1.37414100  |

|   |             |             |             |
|---|-------------|-------------|-------------|
| C | 1.24046600  | 0.00918400  | 2.09085800  |
| C | 2.47193700  | 0.06261800  | 1.35137900  |
| C | 2.41631900  | 0.10498800  | -0.07953200 |
| C | 1.19846200  | 0.06565300  | -0.72263600 |
| H | 0.38555100  | -0.11830400 | 4.06885400  |
| H | -0.93697100 | 0.01754800  | -0.53515100 |
| C | 1.30130700  | -0.07605500 | 3.50468900  |
| C | 3.69272500  | 0.04016900  | 2.07259500  |
| H | 1.16374200  | 0.08876600  | -1.80030200 |
| C | 3.70639800  | -0.03057400 | 3.44057000  |
| C | 2.50258900  | -0.09107100 | 4.16234800  |
| H | 4.61983400  | 0.08983600  | 1.52895400  |
| H | 4.65182800  | -0.04476200 | 3.96601500  |
| H | 2.52047800  | -0.15130600 | 5.24206900  |
| C | 3.64523400  | 0.22964200  | -0.91842800 |
| O | 4.71876600  | 0.65504700  | -0.56570000 |
| O | 3.43830900  | -0.18003700 | -2.19646000 |
| H | 4.26899800  | -0.02312400 | -2.66763600 |
| C | -1.31239100 | 0.08061400  | 2.07227300  |
| O | -1.52328400 | 0.57532600  | 3.15519500  |
| O | -2.31358100 | -0.46222400 | 1.33902800  |
| H | -3.12839100 | -0.32486400 | 1.84363500  |
| C | 0.05873100  | 2.94693900  | 3.77343500  |
| O | 0.04540800  | 2.75852300  | 4.91772300  |

**NDC – Side**

|   |             |             |             |
|---|-------------|-------------|-------------|
| O | 0.08563900  | 3.16169000  | 2.63295000  |
| C | 0.18245300  | 0.53478500  | 0.10875400  |
| C | 0.17475200  | 0.38980800  | 1.47903000  |
| C | 1.38993400  | 0.08454000  | 2.17384200  |
| C | 2.60968100  | -0.03407900 | 1.42026800  |
| C | 2.56770400  | 0.15670800  | 0.00156300  |
| C | 1.36807600  | 0.41903100  | -0.62258100 |
| H | 0.53076700  | -0.04533300 | 4.14708700  |
| H | -0.73255400 | 0.75754000  | -0.41575500 |
| C | 1.43602600  | -0.13952200 | 3.57339300  |
| C | 3.80186100  | -0.36942400 | 2.11130600  |
| H | 1.34022200  | 0.55339200  | -1.69235900 |
| C | 3.80119700  | -0.57683600 | 3.46494100  |
| C | 2.61011700  | -0.46111600 | 4.20088300  |
| H | 4.72018600  | -0.45189200 | 1.55677400  |
| H | 4.72405700  | -0.83361500 | 3.96759700  |
| H | 2.61701600  | -0.62896400 | 5.26955300  |
| C | 3.79966800  | 0.12080000  | -0.84186600 |
| O | 4.93232600  | 0.31470500  | -0.47147800 |
| O | 3.52141400  | -0.14077700 | -2.14476200 |
| H | 4.36646600  | -0.09996300 | -2.61484200 |
| C | -1.11631900 | 0.59805400  | 2.19690800  |
| O | -1.25958600 | 0.90509600  | 3.35479800  |

|   |             |            |             |
|---|-------------|------------|-------------|
| O | -2.19447600 | 0.42321700 | 1.38363400  |
| H | -2.97815700 | 0.61585300 | 1.91895600  |
| C | -3.70836400 | 1.30204500 | -0.90118800 |
| O | -2.85157700 | 1.30496100 | -1.68303400 |
| O | -4.57453100 | 1.30551900 | -0.12833400 |

### 3.4 Geometries of adsorbed CO<sub>2</sub> molecule placed at the Center and Side positions of Li-decorated linkers.

#### BDC – Center

|    |             |             |             |
|----|-------------|-------------|-------------|
| C  | -0.46793600 | -0.58113500 | -0.33667000 |
| C  | -0.51185100 | 0.07256200  | 0.89546500  |
| C  | 0.65824300  | 0.52271900  | 1.48590000  |
| C  | 1.88501700  | 0.32494000  | 0.85082700  |
| C  | 1.92860100  | -0.32868300 | -0.38140700 |
| C  | 0.75877000  | -0.77951900 | -0.97179100 |
| H  | -1.47034900 | 0.21688300  | 1.37232700  |
| H  | 0.64378200  | 1.02970900  | 2.43969100  |
| H  | 2.88719200  | -0.47281600 | -0.85817600 |
| H  | 0.77335200  | -1.28774900 | -1.92490500 |
| C  | 3.14844700  | 0.81290700  | 1.48746400  |
| O  | 3.09040500  | 1.40125600  | 2.61545300  |
| O  | 4.25610500  | 0.63478500  | 0.89440600  |
| C  | -1.73050400 | -1.06765600 | -0.97371900 |
| O  | -1.67590000 | -1.66285700 | -2.09731800 |
| O  | -2.84236700 | -0.87999400 | -0.38346100 |
| Li | 4.95403700  | 1.53438400  | 2.36132100  |



|    |             |             |             |
|----|-------------|-------------|-------------|
| Li | -3.49941100 | -1.75129400 | -1.86550700 |
| C  | 4.13507200  | 3.86797900  | 3.50439800  |
| O  | 3.17054300  | 4.40673900  | 3.82234100  |
| O  | 5.14961100  | 3.36743600  | 3.19869000  |

**BDC – Side**

|    |             |             |             |
|----|-------------|-------------|-------------|
| C  | -0.26155000 | -0.12613000 | -0.26753200 |
| C  | -0.22600000 | 0.30293300  | 1.05987200  |
| C  | 0.98915200  | 0.46382300  | 1.70633500  |
| C  | 2.18212700  | 0.19813900  | 1.03279500  |
| C  | 2.14626200  | -0.23086600 | -0.29468800 |
| C  | 0.93126900  | -0.39239200 | -0.94122400 |
| H  | -1.15929500 | 0.50388700  | 1.56536100  |
| H  | 1.03609100  | 0.79413400  | 2.73378400  |
| H  | 3.07964800  | -0.43179200 | -0.80005500 |
| H  | 0.88419300  | -0.72392400 | -1.96826400 |
| C  | 3.49449900  | 0.37400100  | 1.73029200  |
| O  | 3.50779700  | 0.76020800  | 2.94377400  |
| O  | 4.57203100  | 0.13766200  | 1.10309700  |
| C  | -1.57284200 | -0.30042600 | -0.96522100 |
| O  | -1.59071300 | -0.69297900 | -2.17571400 |
| O  | -2.65303600 | -0.05404200 | -0.33885300 |
| Li | 5.37407600  | 0.65602600  | 2.69581200  |
| Li | -3.41030500 | -0.54710200 | -1.94221500 |
| C  | 4.89256800  | 2.85847000  | 4.22559200  |

|   |            |            |            |
|---|------------|------------|------------|
| O | 5.82638700 | 2.27151300 | 3.82964500 |
| O | 4.01371100 | 3.47327600 | 4.63949500 |

**FBDC – Center**

|    |             |             |             |
|----|-------------|-------------|-------------|
| C  | -0.41336300 | -0.59593500 | -0.35724400 |
| C  | -0.49978400 | 0.03470600  | 0.87946400  |
| C  | 0.64244800  | 0.55310800  | 1.46217900  |
| C  | 1.89295100  | 0.46824900  | 0.84470300  |
| C  | 1.94984800  | -0.16219500 | -0.40346300 |
| C  | 0.82060400  | -0.69290400 | -1.00066400 |
| H  | -1.45040800 | 0.12194200  | 1.38322900  |
| H  | 2.91391200  | -0.21982200 | -0.88668200 |
| H  | 0.87225200  | -1.18291500 | -1.96125100 |
| C  | 3.15863900  | 1.00357200  | 1.44522200  |
| O  | 3.18341500  | 1.38604300  | 2.65348900  |
| O  | 4.19697200  | 1.05100700  | 0.71488400  |
| C  | -1.64673200 | -1.16195900 | -0.98939400 |
| O  | -1.55872600 | -1.73802700 | -2.11922200 |
| O  | -2.76107800 | -1.05745700 | -0.38610100 |
| F  | 0.49833800  | 1.16308100  | 2.64903700  |
| Li | 4.97361000  | 1.79768200  | 2.23385800  |
| Li | -3.37354500 | -1.95680500 | -1.87434400 |
| C  | 4.06645300  | 3.79153200  | 3.86876700  |
| O  | 3.10701600  | 4.15075600  | 4.38960600  |
| O  | 5.07330800  | 3.47323300  | 3.35983500  |

**FBDC – Side**

|    |             |             |             |
|----|-------------|-------------|-------------|
| C  | -0.27672800 | -0.13933700 | -0.16453800 |
| C  | -0.18173800 | 0.41218200  | 1.10874600  |
| C  | 1.06507000  | 0.63212700  | 1.66581000  |
| C  | 2.24552500  | 0.31975500  | 0.98658500  |
| C  | 2.12122600  | -0.22473200 | -0.29674700 |
| C  | 0.88400900  | -0.45819500 | -0.86958400 |
| H  | -1.07283800 | 0.66936500  | 1.66091000  |
| H  | 3.03261900  | -0.45787000 | -0.82705800 |
| H  | 0.79514600  | -0.88337200 | -1.85793000 |
| C  | 3.61704200  | 0.52919600  | 1.55604900  |
| O  | 3.76487800  | 0.82787400  | 2.77915700  |
| O  | 4.61613200  | 0.38967700  | 0.78402400  |
| C  | -1.62436500 | -0.38267900 | -0.76938000 |
| O  | -1.70209100 | -0.88813700 | -1.93325700 |
| O  | -2.66817100 | -0.08029500 | -0.10934900 |
| F  | 1.09719300  | 1.17896700  | 2.89107700  |
| Li | 5.58694200  | 0.86192800  | 2.30193600  |
| Li | -3.51168700 | -0.72618500 | -1.61607100 |
| C  | 5.18229100  | 2.93564200  | 4.03621600  |
| O  | 6.08144200  | 2.42770400  | 3.48157600  |
| O  | 4.33871100  | 3.47306400  | 4.60223000  |

**DFBDC-1 – Center**

|   |             |             |             |
|---|-------------|-------------|-------------|
| C | -0.15339800 | -0.17320200 | -0.29328500 |
|---|-------------|-------------|-------------|

|    |             |             |             |
|----|-------------|-------------|-------------|
| C  | -0.18931900 | 0.47966500  | 0.93912900  |
| C  | 0.96632500  | 0.70516000  | 1.65679400  |
| C  | 2.21494200  | 0.29180700  | 1.18939500  |
| C  | 2.25008500  | -0.37257700 | -0.03601000 |
| C  | 1.09481100  | -0.59355500 | -0.75967000 |
| H  | -1.13910500 | 0.80997300  | 1.33047100  |
| H  | 3.19781000  | -0.71611200 | -0.42116200 |
| C  | 3.50507600  | 0.52382000  | 1.91522000  |
| O  | 3.55205000  | 1.31829100  | 2.90341900  |
| O  | 4.54381800  | -0.08459800 | 1.51066000  |
| C  | -1.44371500 | -0.38103500 | -1.03141100 |
| O  | -1.45197500 | -0.93986800 | -2.16670800 |
| O  | -2.51868600 | 0.02302000  | -0.48263700 |
| F  | 0.84262700  | 1.32847600  | 2.84272700  |
| F  | 1.21864300  | -1.23379100 | -1.93081500 |
| Li | 5.32945900  | 0.81994300  | 2.92290900  |
| Li | -3.26876500 | -0.64230100 | -2.03446600 |
| C  | 2.29838700  | 3.81526400  | 2.80653100  |
| O  | 2.16888800  | 3.72937600  | 1.65580500  |
| O  | 2.42231900  | 3.95773800  | 3.95088400  |

**DFBDC-1 – Side**

|   |             |             |             |
|---|-------------|-------------|-------------|
| C | -0.30381800 | -0.15250000 | -0.13913100 |
| C | -0.20374600 | 0.37571500  | 1.14825500  |
| C | 1.02627100  | 0.61555600  | 1.72724200  |

|    |             |             |             |
|----|-------------|-------------|-------------|
| C  | 2.21917600  | 0.34490700  | 1.05231100  |
| C  | 2.11919400  | -0.17531600 | -0.23789200 |
| C  | 0.88916200  | -0.42037900 | -0.81559400 |
| H  | -1.10706000 | 0.59886500  | 1.69483800  |
| H  | 3.02254000  | -0.38714200 | -0.78904100 |
| C  | 3.58610200  | 0.57575600  | 1.62968500  |
| O  | 3.71809500  | 0.89849200  | 2.84688600  |
| O  | 4.59008300  | 0.43056700  | 0.86687700  |
| C  | -1.67013900 | -0.39504600 | -0.70993800 |
| O  | -1.80525700 | -0.88700000 | -1.86834500 |
| O  | -2.68022900 | -0.09344300 | 0.00394600  |
| F  | 1.03166700  | 1.13404400  | 2.96517900  |
| F  | 0.88457700  | -0.92519000 | -2.05803100 |
| Li | 5.54921700  | 0.93097200  | 2.38642700  |
| Li | -3.59874400 | -0.72150000 | -1.46969500 |
| C  | 5.15702600  | 2.98330700  | 4.15660800  |
| O  | 6.04731500  | 2.47363300  | 3.58957200  |
| O  | 4.32049200  | 3.51942000  | 4.73406600  |

**DFBDC-2 – Center**

|   |            |             |             |
|---|------------|-------------|-------------|
| C | 0.12725700 | 0.08497000  | -0.19761200 |
| C | 0.26458000 | 0.83130700  | 0.96810200  |
| C | 1.45062500 | 0.81554400  | 1.69957100  |
| C | 2.53945800 | 0.05301900  | 1.28993700  |
| C | 2.39536700 | -0.70400900 | 0.12175200  |

|    |             |             |             |
|----|-------------|-------------|-------------|
| C  | 1.22109200  | -0.68844700 | -0.60240300 |
| H  | 3.23810800  | -1.29901000 | -0.19522300 |
| C  | 3.84283700  | 0.01394400  | 2.03318600  |
| O  | 4.01827800  | 0.72986500  | 3.06258000  |
| O  | 4.75882300  | -0.75231700 | 1.59450800  |
| C  | -1.12259500 | 0.07938700  | -1.02863300 |
| O  | -1.15569700 | -0.67292100 | -2.05409500 |
| O  | -2.10814900 | 0.80899600  | -0.71346700 |
| F  | 1.48050500  | 1.57142300  | 2.80237800  |
| H  | 1.11468900  | -1.27082400 | -1.50474300 |
| F  | -0.71950300 | 1.60089800  | 1.44528800  |
| Li | 5.68524300  | -0.05987300 | 3.03623500  |
| Li | -2.84702000 | 0.05254300  | -2.22507500 |
| C  | 0.51209300  | 4.19061500  | 1.97311700  |
| O  | 1.10977300  | 3.98358200  | 0.99947500  |
| O  | -0.08218600 | 4.42098000  | 2.94170300  |

**DFBDC-2 – Side**

|   |             |             |             |
|---|-------------|-------------|-------------|
| C | -0.26964400 | -0.06834400 | -0.22079300 |
| C | -0.21876200 | 0.51011900  | 1.04470300  |
| C | 1.00215300  | 0.76359900  | 1.67137700  |
| C | 2.20783400  | 0.45106500  | 1.05054200  |
| C | 2.15214300  | -0.12155000 | -0.22512000 |
| C | 0.94554400  | -0.37837400 | -0.84239700 |
| H | 3.08774700  | -0.35566200 | -0.70960700 |

|    |             |             |             |
|----|-------------|-------------|-------------|
| C  | 3.54669300  | 0.69317700  | 1.68628200  |
| O  | 3.62460800  | 1.02115100  | 2.90721500  |
| O  | 4.58350100  | 0.54953100  | 0.96879300  |
| C  | -1.55368600 | -0.36716200 | -0.93795000 |
| O  | -1.48429800 | -0.88659600 | -2.09798500 |
| O  | -2.66959300 | -0.10862200 | -0.39823700 |
| F  | 0.94923500  | 1.33137900  | 2.87882300  |
| H  | 0.90517700  | -0.82474400 | -1.82413600 |
| F  | -1.31893400 | 0.85220200  | 1.71774800  |
| Li | 5.47242600  | 1.06414000  | 2.52705900  |
| Li | -3.32510000 | -0.80361800 | -1.97505600 |
| C  | 4.99232100  | 3.12408400  | 4.26622600  |
| O  | 5.90913400  | 2.61632000  | 3.74113500  |
| O  | 4.12873100  | 3.65867800  | 4.80381100  |

**TFBDC – Center**

|   |             |             |             |
|---|-------------|-------------|-------------|
| C | -0.25675600 | -0.26484600 | 0.00148100  |
| C | -0.16324200 | -0.73637600 | 1.30516800  |
| C | 0.98041200  | -0.53192400 | 2.06257700  |
| C | 2.05805500  | 0.18233300  | 1.55516300  |
| C | 1.95773900  | 0.66435500  | 0.25705900  |
| C | 0.82894200  | 0.43417900  | -0.51191700 |
| C | 3.28702200  | 0.43650600  | 2.38460600  |
| O | 3.88222000  | -0.54071800 | 2.91352100  |
| O | 3.68819200  | 1.63000200  | 2.51724700  |

|    |             |             |             |
|----|-------------|-------------|-------------|
| C  | -1.49231000 | -0.50229800 | -0.82680500 |
| O  | -1.36117800 | -1.01947000 | -1.97183200 |
| O  | -2.61367500 | -0.17510500 | -0.34686900 |
| F  | 1.01628900  | -1.00692100 | 3.31297800  |
| F  | 0.78806600  | 0.92932200  | -1.75362300 |
| F  | 2.97604400  | 1.34842000  | -0.28606000 |
| F  | -1.17133900 | -1.43070900 | 1.84477600  |
| Li | 5.04402600  | 0.80489100  | 3.48360600  |
| Li | -3.21104600 | -0.82389200 | -1.98409300 |
| C  | 2.95052800  | 3.94442000  | 1.12790900  |
| O  | 1.81815100  | 3.69313400  | 1.15932200  |
| O  | 4.07086600  | 4.24349500  | 1.07993900  |

**TFBDC – Side**

|   |             |             |             |
|---|-------------|-------------|-------------|
| C | -0.00938900 | -0.00733000 | 0.05303500  |
| C | -0.03234000 | -0.16430700 | 1.43343800  |
| C | 1.14019500  | -0.18204800 | 2.17385500  |
| C | 2.37580800  | -0.00792300 | 1.56395400  |
| C | 2.39607900  | 0.16219800  | 0.18623700  |
| C | 1.22844400  | 0.14879400  | -0.55874500 |
| C | 3.64787700  | 0.00840900  | 2.36671100  |
| O | 3.90023400  | -0.95845100 | 3.13507400  |
| O | 4.42994300  | 0.99552500  | 2.23615500  |
| C | -1.28210100 | -0.00573700 | -0.75273200 |
| O | -1.37322200 | -0.79024800 | -1.73863200 |



|    |             |             |             |
|----|-------------|-------------|-------------|
| O  | -2.21089100 | 0.77998400  | -0.41389700 |
| F  | 1.05990800  | -0.33532000 | 3.50066900  |
| F  | 1.31101400  | 0.32419600  | -1.88204600 |
| F  | 3.56438500  | 0.32004900  | -0.45403200 |
| F  | -1.19468200 | -0.33595300 | 2.07306600  |
| Li | 5.46500200  | 0.01688700  | 3.42918900  |
| Li | -3.04990800 | 0.00300000  | -1.88049300 |
| C  | 4.46012800  | 3.03156000  | 0.31792000  |
| O  | 3.31076100  | 3.18642000  | 0.35515900  |
| O  | 5.61354000  | 2.92052100  | 0.25292300  |

**DCIBDC-1 – Center**

|   |             |             |             |
|---|-------------|-------------|-------------|
| C | -0.48493200 | -0.52113000 | -0.29554700 |
| C | -0.58722400 | -0.49857500 | 1.09492100  |
| C | 0.46757700  | -0.10107600 | 1.90043300  |
| C | 1.66898300  | 0.32742800  | 1.32682400  |
| C | 1.75211000  | 0.35632300  | -0.06434000 |
| C | 0.70966400  | -0.07359300 | -0.86986900 |
| H | -1.52239500 | -0.79969300 | 1.54045600  |
| H | 2.66002800  | 0.72959700  | -0.51171200 |
| C | 2.89412000  | 0.75366800  | 2.09074100  |
| O | 3.14575600  | 0.25160500  | 3.22004900  |
| O | 3.66995000  | 1.60045100  | 1.54443300  |
| C | -1.67541000 | -1.04038400 | -1.05466400 |
| O | -1.52372600 | -1.59451200 | -2.18126500 |

|    |             |             |             |
|----|-------------|-------------|-------------|
| O  | -2.82119600 | -0.93547900 | -0.51316700 |
| Cl | 0.94858000  | 0.04440700  | -2.59840600 |
| Cl | 0.18740500  | -0.09690200 | 3.62701000  |
| Li | -3.35971900 | -1.76934000 | -2.07286000 |
| Li | 4.62108900  | 1.39042500  | 3.17008600  |
| C  | 4.73441500  | 4.06138900  | 2.56442800  |
| O  | 4.33237200  | 4.82701100  | 1.80722900  |
| O  | 5.16962300  | 3.32128700  | 3.36185200  |

**DCIBDC-1 – Side**

|    |             |             |             |
|----|-------------|-------------|-------------|
| C  | 0.00873000  | 0.02680600  | -0.01493400 |
| C  | -0.00829100 | 0.19929100  | 1.36892800  |
| C  | 1.15892000  | 0.28776700  | 2.10728100  |
| C  | 2.40186600  | 0.23781300  | 1.47032200  |
| C  | 2.41927300  | 0.12354100  | 0.08201100  |
| C  | 1.25210900  | 0.00123200  | -0.65567100 |
| H  | -0.96585800 | 0.26481100  | 1.86111900  |
| H  | 3.37456600  | 0.13161200  | -0.41930800 |
| C  | 3.73264300  | 0.28141400  | 2.16466500  |
| O  | 3.86819400  | -0.23640100 | 3.31394100  |
| O  | 4.71256400  | 0.81315400  | 1.56023000  |
| C  | -1.32499700 | -0.12934100 | -0.69404600 |
| O  | -1.42137200 | -0.78277100 | -1.77212100 |
| O  | -2.34416200 | 0.38280100  | -0.13205200 |
| Cl | 1.42684400  | -0.11226800 | -2.39125900 |

|    |             |             |             |
|----|-------------|-------------|-------------|
| Cl | 0.99181900  | 0.53277600  | 3.83291600  |
| Li | -3.20858000 | -0.34773900 | -1.59486800 |
| Li | 5.60512600  | 0.36531300  | 3.12558400  |
| C  | 2.53162900  | -2.47245100 | 4.27237600  |
| O  | 2.98643300  | -2.30046300 | 5.32614500  |
| O  | 2.06382300  | -2.69739200 | 3.23435200  |

**DCIBDC-2 – Center**

|    |             |             |             |
|----|-------------|-------------|-------------|
| C  | 0.31261800  | 0.11610700  | 0.13343300  |
| C  | 0.44349200  | 0.28048600  | 1.51473500  |
| C  | 1.67355900  | 0.03956600  | 2.14415900  |
| C  | 2.78180500  | -0.35676300 | 1.38682500  |
| C  | 2.63755700  | -0.50514600 | 0.00878000  |
| C  | 1.41844600  | -0.29858000 | -0.60417700 |
| H  | 3.50636800  | -0.78959000 | -0.56559300 |
| C  | 4.13691700  | -0.67599800 | 1.96106400  |
| O  | 4.24187800  | -1.27095800 | 3.07165200  |
| O  | 5.15793200  | -0.37039100 | 1.26818700  |
| C  | -0.94685600 | 0.40091800  | -0.63575500 |
| O  | -1.27821200 | -0.40023800 | -1.56085100 |
| O  | -1.62409000 | 1.44344500  | -0.38887200 |
| Cl | 1.81840800  | 0.30608800  | 3.85855800  |
| H  | 1.29998900  | -0.44482000 | -1.66755500 |
| Cl | -0.94014600 | 0.72869100  | 2.47823100  |
| Li | 6.04663600  | -1.10001200 | 2.71777600  |

|    |             |            |             |
|----|-------------|------------|-------------|
| Li | -2.72108200 | 0.76136400 | -1.70831700 |
| C  | -0.79416600 | 3.74564700 | 0.93585500  |
| O  | 0.32751200  | 3.47829800 | 0.80556900  |
| O  | -1.90059000 | 4.06544300 | 1.07952700  |

**DCIBDC-2 – Side**

|    |             |             |             |
|----|-------------|-------------|-------------|
| C  | 0.11743600  | -0.02564900 | -0.03835300 |
| C  | 0.12373400  | 0.18402400  | 1.34506800  |
| C  | 1.32465200  | 0.09581300  | 2.06651500  |
| C  | 2.52340500  | -0.18457300 | 1.40270600  |
| C  | 2.50318600  | -0.37743200 | 0.02281700  |
| C  | 1.31686000  | -0.32466500 | -0.68076800 |
| H  | 3.43816100  | -0.56615300 | -0.48283200 |
| C  | 3.85795400  | -0.31114000 | 2.08447000  |
| O  | 3.96915100  | -0.92600900 | 3.18065200  |
| O  | 4.86983900  | 0.18754400  | 1.49283800  |
| C  | -1.10564500 | 0.08500500  | -0.91006500 |
| O  | -1.21936500 | -0.73542600 | -1.87387600 |
| O  | -1.95567000 | 0.99903700  | -0.71013100 |
| Cl | 1.31981000  | 0.40499800  | 3.77970900  |
| H  | 1.29500800  | -0.50647400 | -1.74476300 |
| Cl | -1.36290600 | 0.49335500  | 2.19760000  |
| Li | 5.73643700  | -0.40836800 | 3.01958500  |
| Li | -2.78728100 | 0.20798000  | -2.15800100 |
| C  | 4.09484200  | 2.59891700  | 0.14623300  |

|   |            |            |             |
|---|------------|------------|-------------|
| O | 3.76557600 | 3.01703700 | 1.17753300  |
| O | 4.41462400 | 2.21985500 | -0.90276400 |

**NDC – Center**

|   |             |             |             |
|---|-------------|-------------|-------------|
| C | 0.10165800  | -0.33235000 | -0.16747600 |
| C | 0.14420900  | 0.05569900  | 1.15205400  |
| C | 1.40707900  | 0.20060200  | 1.80674900  |
| C | 2.61481500  | -0.04253200 | 1.06234600  |
| C | 2.51666600  | -0.41793900 | -0.31680900 |
| C | 1.27398300  | -0.54950000 | -0.89654100 |
| H | 0.61533100  | 0.71996300  | 3.74146500  |
| H | -0.86102800 | -0.45473100 | -0.64081800 |
| C | 1.51644300  | 0.54852100  | 3.17821600  |
| C | 3.85779300  | 0.12576900  | 1.72742400  |
| H | 1.21903100  | -0.82434500 | -1.93882300 |
| C | 3.91749100  | 0.48784700  | 3.04707700  |
| C | 2.73702300  | 0.69178300  | 3.78234300  |
| H | 4.76173800  | -0.05418400 | 1.17253900  |
| H | 4.88016700  | 0.60970000  | 3.52641200  |
| H | 2.78888200  | 0.96534800  | 4.82803300  |
| C | 3.69194900  | -0.70930000 | -1.21169100 |
| O | 4.84321400  | -0.97471100 | -0.73707600 |
| O | 3.50472000  | -0.71176100 | -2.47135700 |
| C | -1.18020100 | 0.34145000  | 1.79829300  |
| O | -1.27996000 | 1.18583700  | 2.74966200  |

|    |             |             |             |
|----|-------------|-------------|-------------|
| O  | -2.21582600 | -0.24544800 | 1.35354700  |
| Li | 5.28636600  | -1.14883100 | -2.51623400 |
| Li | -3.06987600 | 0.75875600  | 2.63781900  |
| C  | 0.30125300  | 3.53283700  | 2.81438600  |
| O  | 0.18991300  | 3.60307600  | 3.96788500  |
| O  | 0.42651800  | 3.51095800  | 1.66138200  |

**NDC – Side**

|   |             |             |             |
|---|-------------|-------------|-------------|
| C | 0.06118800  | 0.00965100  | -0.02647500 |
| C | 0.08371200  | -0.04861000 | 1.34967800  |
| C | 1.34201600  | -0.04000200 | 2.03485500  |
| C | 2.55585500  | 0.01687700  | 1.26337700  |
| C | 2.47298800  | 0.06833900  | -0.16309000 |
| C | 1.23987600  | 0.08450500  | -0.77357000 |
| H | 0.54303500  | -0.15387600 | 4.02734200  |
| H | -0.89522000 | -0.00648300 | -0.52641000 |
| C | 1.44899600  | -0.10976300 | 3.44884200  |
| C | 3.79523500  | 0.04929100  | 1.95385000  |
| H | 1.19562100  | 0.14238100  | -1.85083300 |
| C | 3.85176400  | -0.01133300 | 3.32074500  |
| C | 2.66805300  | -0.10140800 | 4.07335000  |
| H | 4.70488500  | 0.10326400  | 1.38090900  |
| H | 4.81212900  | 0.00770700  | 3.81906800  |
| H | 2.71750300  | -0.15701100 | 5.15308200  |
| C | 3.66237800  | 0.06451300  | -1.07893400 |

|    |             |             |             |
|----|-------------|-------------|-------------|
| O  | 4.76078500  | -0.48239900 | -0.72903600 |
| O  | 3.54585500  | 0.58305400  | -2.23315500 |
| C  | -1.26059300 | -0.09847000 | 2.02598400  |
| O  | -1.40089800 | 0.19781300  | 3.25629300  |
| O  | -2.27527000 | -0.42215600 | 1.32775200  |
| Li | 5.29043600  | 0.02679400  | -2.41963500 |
| Li | -3.17486100 | -0.14930300 | 2.90351400  |
| C  | 4.81261500  | -2.82551800 | 0.85819300  |
| O  | 5.87846300  | -2.56916500 | 1.24050800  |
| O  | 3.75485900  | -3.12895400 | 0.49124800  |
